# Supplementary material for: Specific removal of protein using protein imprinted polydopamine shells on modified amino-functionalized magnetic nanoparticles
Source: Royal Society of Chemistry journal article supplement (doi:10.1039/c4ra07965e), 2014-01-01
Supplement: c4ra07965e1.pdf [file c4ra07965e1.pdf]

## **Specific depletion of protein using polydopamine imprinting shells modified amino-functionalized magnetic nanoparticles**

Ruixia Gao,<sup>\*a</sup> Lili Zhang,<sup>b</sup> Yi Hao,<sup>b</sup> Xihui Cui,<sup>b</sup> Yuhai Tang<sup>\*a,b</sup>

<sup>a</sup> Institute of Analytical Science, School of Science, Xi'an Jiaotong University, Xi'an 710049, P. R. China. E-mail: [ruixiagao@mail.xjtu.edu.cn](mailto:ruixiagao@mail.xjtu.edu.cn); [tyh57@mail.xjtu.edu.cn](mailto:tyh57@mail.xjtu.edu.cn). Tel./Fax: +86 029 8265 5399.

<sup>b</sup> College of Pharmacy, Xi'an Jiaotong University, Xi'an 710061, P. R. China.

**Table S1** Effect of  $Q_{AD}$  on the immobilization of BSA.

|                 |      |       |       |       |       |
|-----------------|------|-------|-------|-------|-------|
| $Q_{AD}^a$ (mg) | 10   | 20    | 30    | 40    | 50    |
| $Q_{IM}^b$ (mg) | 9.15 | 18.34 | 25.13 | 25.08 | 24.96 |

<sup>a</sup>  $Q_{AD}$  (mg) is the mass of the added BSA when polymerization.

<sup>b</sup>  $Q_{IM}$  (mg) is the mass of the immobilized BSA onto  $Fe_3O_4@NH_2$ . (Each polymerization adopted 200 mg of  $Fe_3O_4@NH_2$ .)

**Table S2** Effect of time on the immobilization of BSA.

|                 |      |       |       |       |       |
|-----------------|------|-------|-------|-------|-------|
| Time (min)      | 10   | 20    | 30    | 40    | 50    |
| $Q_{AD}^a$ (mg) | 30   | 30    | 30    | 30    | 30    |
| $Q_{IM}^b$ (mg) | 4.68 | 14.95 | 25.13 | 24.98 | 25.24 |

<sup>a</sup>  $Q_{AD}$  (mg) is the mass of the added BSA when polymerization.

<sup>b</sup>  $Q_{IM}$  (mg) is the mass of the immobilized BSA onto  $Fe_3O_4@NH_2$ . (Each polymerization adopted 200 mg of  $Fe_3O_4@NH_2$ .)

**Table S3** The adsorption capacity, imprinting factors, and selectivity coefficients of BSA, BHb, transferrin, and IgG for  $Fe_3O_4@BSA$ -MIPs and  $Fe_3O_4@NIPs$ .<sup>a</sup>

| Proteins    | $Q_{MIPs}$ (mg g <sup>-1</sup> ) | $Q_{NIPs}$ (mg g <sup>-1</sup> ) | $IF$ | $SC$ |
|-------------|----------------------------------|----------------------------------|------|------|
| BSA         | 107.8                            | 32.15                            | 3.35 | —    |
| BHb         | 72.13                            | 36.54                            | 1.97 | 1.70 |
| Transferrin | 35.41                            | 29.38                            | 1.21 | 2.77 |
| IgG         | 40.15                            | 33.67                            | 1.19 | 2.82 |

<sup>a</sup> In these experiments, 10 mg of  $Fe_3O_4@BSA$ -MIPs and  $Fe_3O_4@NIPs$  were incubated in 3 mL of Tris-HCl (10 mM, pH = 7.0) solution of BSA, BHb, transferrin, and IgG at a concentration of 0.30 mg mL<sup>-1</sup> respectively at room temperature for 20 min. (n = 5)
